# Supplementary material for: Cause of death during nasopharyngeal carcinoma survivorship: a population-based analysis
Source: Frontiers journal article supplement (doi:10.3389/fonc.2023.1269118), 2023-10-18
Supplement: Data_Sheet_1.zip [file Data_Sheet_1.zip]

## Sheet: Sheet1
Supplementary Table 21 Standardized-mortality ratios(SMRs) for each cause of death following NPC diagnosis in patients without surgery
	Timing of Death After Diagnosis
	All years		<1 year		1 to <5 years		5 to <10 years		≥10 years
	No.(%)	SMR(95% CI)	No.(%)	SMR(95% CI)	No.(%)	SMR(95% CI)	No.(%)	SMR(95% CI)	No.(%)	SMR(95% CI)
Cause of Death	1536(100%)	8.28#(7.87-8.70)	423(100%)	18.37#(16.66-20.21)	765(100%)	9.15#(8.51-9.82)	278(100%)	4.74#(4.20-5.33)	70(100%)	3.46#(2.70-4.37)
All Malignant Cancers	1250(81.38%)	24.71#(23.36-26.12)	371(87.71%)	58.15#(52.38-64.38)	671(87.71%)	29.18#(27.01-31.47)	176(63.31%)	11.12#(9.54-12.89)	32(45.71%)	5.94#(4.06-8.39)
Nasopharynx	816(53.13%)	4,401.66#(4104.80-4714.33)	221(52.25%)	9,523.20#(8308.94-10864.98)	473(61.83%)	5,553.08#(5063.85-6076.81)	110(39.57%)	1,903.25#(1564.24-2293.93)	12(17.14%)	624.87#(322.88-1091.52)
Oropharynx	24(1.56%)	218.49#(139.99-325.09)	13(3.07%)	1,058.92#(563.83-1810.79)	9(1.18%)	188.16#(86.04-357.18)	2(0.72%)	54.98#(6.66-198.62)	0(0)	0(0-276.04)
Oral Cavity and Other Pharynx	78(5.08%)	22.55#(17.82-28.14)	28(6.62%)	40.05#(26.62-57.89)	37(4.84%)	21.44#(15.10-29.56)	8(2.88%)	8.34#(3.60-16.44)	5(7.14%)	65.30#(21.20-152.38)
Digestive System	38(2.47%)	2.45#(1.74-3.37)	8(1.89%)	4.24#(1.83-8.34)	17(2.22%)	2.43#(1.42-3.90)	10(3.60%)	2.03(0.98-3.74)	3(4.29%)	1.76(0.36-5.14)
Respiratory System	90(5.86%)	6.34#(5.10-7.79)	26(6.15%)	13.75#(8.98-20.15)	36(4.71%)	5.48#(3.84-7.58)	20(7.19%)	4.62#(2.82-7.13)	8(11.43%)	5.70#(2.46-11.24)
Bones and Joints/Soft Tissue	5(0.33%)	18.07#(5.87-42.17)	1(0.24%)	28.94(0.73-161.24)	1(0.13%)	6.24(0.16-34.79)	3(1.08%)	36.58#(7.54-106.89)	0(0)	0(0-0)
Skin excluding Basal and Squamous	21(1.37%)	23.59#(14.60-36.07)	11(2.60%)	95.73#(47.79-171.29)	7(0.92%)	17.12#(6.88-35.28)	3(1.08%)	10.78#(2.22-31.50)	0(0)	0(0-41.90)
Breast/Genital/Urinary/Endocrine System	6(0.39%)	13.60#(4.99-29.61)	0(0)	0(0-54.47)	3(0.39%)	12.96#(2.67-37.86)	3(1.08%)	21.16#(4.36-61.85)	0(0)	0(0-0)
Brain and Other Nervous System	7(0.46%)	5.52#(2.22-11.37)	4(0.95%)	26.01#(7.09-66.59)	3(0.39%)	5.23#(1.08-15.28)	0(0)	0(0-9.14)	0(0)	0(0-26.82)
lymph/Blood	11(0.72%)	20.34#(10.15-36.40)	2(0.47%)	15.64#(1.89-56.48)	7(0.92%)	22.41#(9.01-46.17)	1(0.36%)	18.95(0.48-105.59)	1(1.43%)	20.96(0.53-116.79)
Miscellaneous Malignant Cancer	154(10.03%)	42.51#(36.06-49.78)	57(13.48%)	123.94#(93.87-160.58)	78(10.20%)	47.37#(37.44-59.12)	16(5.76%)	14.18#(8.11-23.03)	3(4.29%)	7.73#(1.59-22.59)
In situ, benign or unknown behavior neoplasm	8(0.52%)	7.55#(3.26-14.87)	0(0)	0(0-28.30)	3(0.39%)	6.31#(1.30-18.43)	4(1.44%)	11.87#(3.23-30.39)	1(1.43%)	8.57(0.22-47.73)
Noncancer	278(18.10%)	9.07#(8.04-10.21)	52(12.29%)	12.52#(9.35-16.41)	91(11.90%)	5.96#(4.80-7.32)	98(35.25%)	10.37#(8.42-12.63)	37(52.86%)	20.90#(14.72-28.81)
Infections	24(1.56%)	23.14#(14.83-34.43)	9(2.13%)	49.34#(22.56-93.66)	7(0.92%)	16.21#(6.52-33.41)	6(2.16%)	24.68#(9.06-53.72)	2(2.86%)	11.11#(1.35-40.14)
Diabetes Mellitus	5(0.33%)	0.69(0.22-1.61)	2(0.47%)	2.32(0.28-8.37)	1(0.13%)	0.31(0.01-1.74)	0(0)	0(0-1.59)	2(2.86%)	2.36(0.29-8.52)
Alzheimers (ICD-9 and 10 only)	6(0.39%)	1.68(0.62-3.65)	0(0)	0(0-9.31)	2(0.26%)	1.29(0.16-4.66)	3(1.08%)	2.52(0.52-7.35)	1(1.43%)	2.31(0.06-12.85)
Diseases of Heart	66(4.30%)	1.50#(1.16-1.90)	13(3.07%)	2.32#(1.24-3.97)	20(2.61%)	1.01(0.61-1.55)	24(8.63%)	1.73#(1.11-2.58)	9(12.86%)	1.90(0.87-3.61)
Hypertension without Heart Disease	4(0.26%)	1.84(0.50-4.72)	0(0)	0(0-14.99)	1(0.13%)	1.06(0.03-5.92)	1(0.36%)	1.40(0.04-7.80)	2(2.86%)	7.50(0.91-27.08)
Cerebrovascular Diseases	20(1.30%)	2.17#(1.33-3.36)	0(0)	0(0-3.19)	5(0.65%)	1.21(0.39-2.83)	11(3.96%)	3.80#(1.90-6.79)	4(5.71%)	3.89#(1.06-9.97)
Diseases of Arteries	4(0.26%)	28.01#(7.63-71.71)	0(0)	0(0-45.12)	4(0.52%)	65.50#(17.85-167.71)	0(0)	0(0-0)	0(0)	0(0-0)
Pneumonia and Influenza	17(1.11%)	4.69#(2.73-7.51)	4(0.95%)	8.82#(2.40-22.59)	8(1.05%)	4.99#(2.15-9.82)	4(1.44%)	3.41(0.93-8.72)	1(1.43%)	2.56(0.06-14.28)
Chronic Obstructive Pulmonary Disease and Allied Cond	27(1.76%)	2.88#(1.90-4.19)	3(0.71%)	2.62(0.54-7.65)	9(1.18%)	2.15(0.98-4.07)	11(3.96%)	3.66#(1.83-6.55)	4(5.71%)	3.86#(1.05-9.89)
Chronic Liver Disease and Cirrhosis	4(0.26%)	1.03(0.28-2.64)	0(0)	0(0-7.77)	3(0.39%)	1.69(0.35-4.95)	0(0)	0(0-3.01)	1(1.43%)	2.47(0.06-13.75)
Nephritis/Nephrotic Syndrome/Nephrosis	0(0)	0(0-1.03)	0(0)	0(0-8.40)	0(0)	0(0-2.31)	0(0)	0(0-3.26)	0(0)	0(0-8.94)
Pregnancy/Childbirth/Puerperium	2(0.13%)	116.33#(14.09-420.24)	1(0.24%)	414.82#(10.50-2311.23)	1(0.13%)	117.94#(2.99-657.10)	0(0)	0(0-738.80)	0(0)	0(0-2817.84)
Symptoms,signs and ill-defined conditions	5(0.33%)	2.95(0.96-6.87)	1(0.24%)	4.44(0.11-24.73)	2(0.26%)	2.53(0.31-9.14)	2(0.72%)	3.86(0.47-13.94)	0(0)	0(0-22.56)
Accidents and Adverse Effects	17(1.11%)	1.93#(1.12-3.09)	4(0.95%)	3.73#(1.02-9.54)	4(0.52%)	1.00(0.27-2.56)	7(2.52%)	2.52#(1.01-5.19)	2(2.86%)	2.08(0.25-7.51)
Suicide and Self-Inflicted Injury	6(0.39%)	2.06(0.76-4.49)	4(0.95%)	10.66#(2.91-27.30)	1(0.13%)	0.73(0.02-4.08)	1(0.36%)	1.13(0.03-6.28)	0(0)	0(0-13.06)
Homicide and Legal Intervention	2(0.13%)	2.03(0.25-7.35)	0(0)	0(0-28.69)	2(0.26%)	4.33(0.52-15.64)	0(0)	0(0-12.72)	0(0)	0(0-35.83)
Other Cause of Death	69(4.49%)	2.75#(2.14-3.48)	11(2.60%)	3.77#(1.88-6.75)	21(2.75%)	1.90#(1.17-2.90)	28(10.07%)	3.43#(2.28-4.95)	9(12.86%)	3.10#(1.42-5.88)
